# Supplementary material for: Cranial Ultrasound Abnormalities in Small for Gestational Age or Growth-Restricted Infants Born over 32 Weeks Gestation: A Systematic Review and Meta-Analysis
Source: MDPI journal article supplement (doi:10.3390/brainsci12121713), 2022-12-14
Supplement: s1 [file s1]

## Appendix SA

### Search Terms

#### PubMed Search Terms:

(((((brain ultrasound[MeSH Terms])) OR (cranial ultrasound[MeSH Terms])) OR (echoencephalography[MeSH Terms])) OR ((intracranial hemorrhage[MeSH Terms]) OR (periventricular leucomalacia[MeSH Terms]) OR (intraventricular haemorrhage) OR (intraventricular hemorrhage) OR (intracranial pathology) OR (intracranial haemorrhage) OR (intracerebral haemorrhage) OR (intracerebral hemorrhage) AND ((((((fetal growth retardation[MeSH Terms]) OR (retardation, intrauterine growth[MeSH Terms])) OR (infant, small for gestational age[MeSH Terms])) OR ("growth restriction")) OR ("fetal growth restriction")) OR ("intrauterine growth restriction")) AND ((humans[Filter]) AND (english[Filter]))

#### MEDLINE Search Terms:

- 1 Infant, Newborn/ or Infant, Premature/ or Obstetric Labor, Premature/ or Premature Birth/
- 2 (Late Pre?term or moderate Pre?term or pre?mature\* or term or neonate\* or newborn\*).tw.
- 3 Infant, Low Birth Weight/ or "Infant, Small for Gestational Age"/ or Infant, Very Low Birth Weight/

- 4 ((infant\* or neonate\*newborn\*) adj3 (low birth weight or small for gestational age)).tw.
- 5 \*Fetal Growth Retardation/ or \*Infant, Premature, Diseases/ or Intensive Care,  
Neonatal/ or Intensive Care Units, Neonatal/
- 6 (((fetal or foetal) adj (growth retardation or growth restriction)) or FGR).tw.
- 7 ((intrauterine adj (growth retardation or growth restriction)) or IUGR or 'growth  
restriction').tw.
- 8 Echoencephalography/ or Neonatal Screening/ or cranial ultrasound.tw. or CUS.tw. or  
brain ultrasound.tw.
- 9 \*Cerebellar Hemorrhage/ or \*Cerebral Hemorrhage/ or \*Cerebral Intraventricular  
Hemorrhage/ or \*Leu?omalacia, Periventricular/
- 10 ((h?emorrhage adj (intraventricular or periventricular or intracerebral or cerebellar)) or  
IVH or PIVH or periventricular leu?omalacia or PVL or intracranial h?emorrhage or intracranial  
pathology or intracerebral h?emorrhage).tw.
- 11 1 or 2
- 12 3 or 4 or 5 or 6 or 7
- 13 9 or 10
- 14 8 and 13
- 15 11 and 12 and 14
- 16 limit 15 to humans

EMBASE Search Terms:

- 1 Infant, Low Birth Weight/ or "Infant, Small for Gestational Age"/ or Infant, Very Low Birth Weight/
- 2 ((infant\* or neonate\*newborn\*) adj3 (low birth weight or small for gestational age)).tw.
- 3 \*Fetal Growth Retardation/ or \*Infant, Premature, Diseases/ or Intensive Care, Neonatal/ or Intensive Care Units, Neonatal/
- 4 (fetal growth retardation or fetal growth restriction or FGR).tw.
- 5 (intrauterine growth retardation or intrauterine growth restriction or IUGR).tw.
- 6 1 or 2 or 3 or 4 or 5
- 7 Echoencephalography/ or cranial ultrasound.tw. or CUS.tw. or brain ultrasound.tw.
- 8 (Echoencephalography/ or cranial ultrasound.tw. or CUS.tw. or brain ultrasound.tw.) and (abnormalit\* or defect\*).tw.
- 9 \*Cerebellar Hemorrhage/ or \*Cerebral Hemorrhage/ or \*Cerebral Intraventricular Hemorrhage/ or \*Leu?omalacia, Periventricular/
- 10 ((h?emorrhage adj (intraventricular or periventricular or intracerebral or cerebellar or intracranial)) or IVH or PIVH or periventricular leu?omalacia or PVL or intracranial pathology).tw.
- 11 7 and 9
- 12 7 and 10
- 13 7 or 8 or 11 or 12
- 14 6 and 13
- 15 limit 14 to human

## Appendix SB

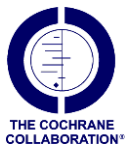

### Data collection form

#### Intervention review – RCTs and non-RCTs

Adopted from: *Effective Practice and Organisation of Care (EPOC). Data collection form. EPOC Resources for review authors. Oslo: Norwegian Knowledge Centre for the Health Services; 2013. Available at: <http://epoc.cochrane.org/epoc-specific-resources-review-authors>*

| Review title or ID |
|--------------------|
|                    |

| Study ID (surname of first author and year first full report of study was published e.g. Smith) |
|-------------------------------------------------------------------------------------------------|
|                                                                                                 |

| Report IDs of other reports of this study (e.g. duplicate publications, follow-up studies) |
|--------------------------------------------------------------------------------------------|
|                                                                                            |

#### General Information

|                                      |  |
|--------------------------------------|--|
| 1. Date form completed               |  |
| 2. Name/ID of person extracting data |  |
| 3. Report title                      |  |
| 4. Reference details                 |  |
| 5. Report author contact details     |  |
| 6. Publication type                  |  |
| 7. Study funding source              |  |
| 8. Possible conflicts of interest    |  |
| 9. Notes:                            |  |

#### Eligibility

| Study Characteristics | Review Inclusion Criteria | Yes/ No / Unclear | Location in text<br>(pg & ¶/fig/table) |
|-----------------------|---------------------------|-------------------|----------------------------------------|
| 10. Type of study     | Case Control              | ...               |                                        |
|                       | Cohort Study              | ...               |                                        |

| Study Characteristics                                            | Review Inclusion Criteria    | Yes/ No /<br>Unclear | Location in<br>text<br>(pg &<br>¶/fig/table) |
|------------------------------------------------------------------|------------------------------|----------------------|----------------------------------------------|
|                                                                  | Descriptive Study            | ...                  |                                              |
|                                                                  | Other design (specify):<br>• | ...                  |                                              |
| 11. Participants                                                 | ...                          | ...                  |                                              |
| 12. Subgroup analysis present<br>for gestation                   |                              | ...                  |                                              |
| 13. Subgroup analysis present<br>for weight criteria-<br>SGA/FGR |                              |                      |                                              |
| 14. Cranial ultrasound<br>performed postnatally                  |                              |                      |                                              |
| 15. Decision:                                                    |                              |                      |                                              |
| 16. Reason for exclusion                                         |                              |                      |                                              |

**DO NOT PROCEED IF STUDY EXCLUDED FROM REVIEW**

## Population and setting

|                                             | Description | Location in text<br>(pg & ¶/fig/table) |
|---------------------------------------------|-------------|----------------------------------------|
| 17. Population description                  |             |                                        |
| 18. Setting                                 |             |                                        |
| 19. Inclusion criteria                      |             |                                        |
| 20. Exclusion criteria                      |             |                                        |
| 21. Method/s of recruitment of participants |             |                                        |

## Methods

|                  | Descriptions as stated in report/paper | Location in text<br>(pg & ¶/fig/table) |
|------------------|----------------------------------------|----------------------------------------|
| 22. Aim of study |                                        |                                        |
| 23. Design       |                                        |                                        |
| 24. Start date   |                                        |                                        |
| 25. End date     |                                        |                                        |

## Risk of Bias assessment

| Domain                           | Risk of bias<br><i>Low/<br/>High/Unclear</i> | Support for judgement | Location in text<br>(pg & ¶/fig/table) |
|----------------------------------|----------------------------------------------|-----------------------|----------------------------------------|
| 26. Incomplete outcome data      | ...                                          |                       |                                        |
| 27. Selective outcome reporting? | ...                                          |                       |                                        |
| 28. Other bias                   | ...                                          |                       |                                        |

## Participants

Provide overall data and, if available, comparative data for each intervention or comparison group.

|                                | Description as stated in report/paper | Location in text<br>(pg & ¶/fig/table) |
|--------------------------------|---------------------------------------|----------------------------------------|
| 29. Total no. infants included |                                       |                                        |

|                                                                                    | Description as stated in report/paper | Location in text<br>(pg & ¶/fig/table) |
|------------------------------------------------------------------------------------|---------------------------------------|----------------------------------------|
| 30. <b>Withdrawals and exclusions</b><br><i>(if not provided below by outcome)</i> |                                       |                                        |
| 31. <b>Gestation included</b>                                                      |                                       |                                        |
| 32. <b>Gestation relevant to subgroup analysis</b>                                 |                                       |                                        |
| 33. <b>Sex</b>                                                                     |                                       |                                        |
| 34. <b>Co-morbidities</b>                                                          |                                       |                                        |
| 35. <b>Subgroups measured</b>                                                      |                                       |                                        |
| 36. <b>Subgroups reported</b>                                                      |                                       |                                        |
| 37. <b>Notes:</b>                                                                  |                                       |                                        |

## Outcomes

|                                      | Description as stated in report/paper | Location in text<br>(pg & ¶/fig/table) |
|--------------------------------------|---------------------------------------|----------------------------------------|
| 38. <b>Outcome name</b>              | Cranial ultrasound abnormalities      |                                        |
| 39. <b>Time points measured</b>      |                                       |                                        |
| 40. <b>Time points reported</b>      |                                       |                                        |
| 41. <b>Outcome definition</b>        |                                       |                                        |
| 42. <b>Person performing imaging</b> |                                       |                                        |
| 43. <b>Person reporting imaging</b>  |                                       |                                        |

## Results

|                                       | Description as stated in report/paper |                  |                    |                  | Location in text<br>(pg & ¶/fig/table) |
|---------------------------------------|---------------------------------------|------------------|--------------------|------------------|----------------------------------------|
| 44. <b>Comparison</b>                 |                                       |                  |                    |                  |                                        |
| 45. <b>Outcome</b>                    |                                       |                  |                    |                  |                                        |
| 46. <b>Subgroup (with definition)</b> |                                       |                  |                    |                  |                                        |
| 47. <b>Results</b>                    | <b>FGR/SGA Infants</b>                |                  | <b>AGA Infants</b> |                  |                                        |
|                                       | No. events                            | No. participants | No. events         | No. participants |                                        |
|                                       |                                       |                  |                    |                  |                                        |

|                                                                   | Description as stated in report/paper |  | Location in text<br>(pg & ¶/fig/table) |
|-------------------------------------------------------------------|---------------------------------------|--|----------------------------------------|
| 48. No. missing participants and reasons                          |                                       |  |                                        |
| 49. Key findings of study                                         |                                       |  |                                        |
| 50. Statistical methods used and appropriateness of these methods |                                       |  |                                        |

### Applicability

|                                                              |                              |  |
|--------------------------------------------------------------|------------------------------|--|
| 51. Have important populations been excluded from the study? | ...<br><i>Yes/No/Unclear</i> |  |
| 52. Does the study directly address the review question?     | ...<br><i>Yes/No/Unclear</i> |  |
| 53. Notes:                                                   |                              |  |

### Other information

|                                                           | Description as stated in report/paper |  | Location in text<br>(pg & ¶/fig/table) |
|-----------------------------------------------------------|---------------------------------------|--|----------------------------------------|
| 54. Key conclusions of study authors                      |                                       |  |                                        |
| 55. References to other relevant studies                  |                                       |  |                                        |
| 56. Correspondence required for further study information |                                       |  |                                        |
| 57. Further study information requested                   |                                       |  |                                        |
| 58. Correspondence received                               |                                       |  |                                        |



## Appendix SC

### Newcastle Ottawa Scale

#### COHORT STUDIES

Note: A study can be awarded a maximum of one star for each numbered item within the Selection and Outcome categories. A maximum of two stars can be given for Comparability

##### Selection

1. Representativeness of the exposed cohort
  - a. truly representative of the average neonatal population ★
  - b. somewhat representative of the average neonatal population ★
  - c. selected group of users eg nurses, volunteers
  - d. no description of the derivation of the cohort
2. Selection of the non exposed cohort
  - a. drawn from the same community as the exposed cohort ★
  - b. drawn from a different source
  - c. no description of the derivation of the non exposed cohort
3. Ascertainment of exposure
  - a. secure record (eg surgical records) ★
  - b. structured interview ★
  - c. written self report
  - d. no description
4. Demonstration that outcome of interest was not present at start of study
  - a. yes ★
  - b. no

##### Comparability

1. Comparability of cohorts on the basis of the design or analysis
  - a. study controls for weight ★
  - b. study controls for any additional factor ★ FGR vs SGA, steroid use, chorioamnionitis etc

##### Outcome

1. Assessment of outcome
  - a. independent blind assessment ★
  - b. record linkage ★
  - c. self report
  - d. no description
2. Was follow-up long enough for outcomes to occur
  - a. yes - US within the 1st week of life ★
  - b. no
3. Adequacy of follow up of cohorts
  - a. complete follow up - all subjects accounted for ★

- b. subjects lost to follow up unlikely to introduce bias - small number lost - > 80 % follow up, or description provided of those lost) ★
- c. follow up rate < 79% (select an adequate %) and no description of those lost
- d. no statement

| Newcastle Ottawa Scale: COHORT STUDIES |                                                                                                |                                     |                           |                                                                          |                                                                 |                       |                                                                                                      |                                                                 |                             |
|----------------------------------------|------------------------------------------------------------------------------------------------|-------------------------------------|---------------------------|--------------------------------------------------------------------------|-----------------------------------------------------------------|-----------------------|------------------------------------------------------------------------------------------------------|-----------------------------------------------------------------|-----------------------------|
|                                        | <u>Selection</u>                                                                               |                                     |                           |                                                                          | <u>Comparability</u>                                            | <u>Outcome</u>        |                                                                                                      |                                                                 | <u>Total</u>                |
|                                        | Representativeness of the Exposed Cohort                                                       | Selection of the Non-Exposed Cohort | Ascertainment of Exposure | Demonstration That Outcome of Interest Was Not Present at Start of Study | Comparability of Cohorts on the Basis of the Design or Analysis | Assessment of Outcome | Was Follow-Up Long Enough for Outcomes to Occur                                                      | Adequacy of Follow Up of Cohorts                                |                             |
| Berger, 1997                           | ★<br>• 90% of infants born between 1984-1988 were included in the study                        | ★<br>• Same cohort analysed         | ★<br>• Record based       | -                                                                        | ★<br>• Controlled for weight                                    | ★<br>• Record linkage | -<br>• Ultrasound performed day 5-8                                                                  | ★<br>• ~90% of infants included                                 | ★★★★★★<br><br>Moderate Risk |
| Mercuri, 1998                          | -<br>• Selected group → infants on PNW deemed as 'normal'                                      | ★<br>• Same cohort analysed         | ★<br>• Record based       | -<br>• Unknown                                                           | ★<br>• Controlled for weight                                    | ★<br>• Record linkage | -<br>• No infants enrolled when 6-48 hours of life, unknown timepoint for ultrasound to be performed | -<br>• ~ 32% of infants lost to follow up                       | ★★★★★<br><br>Moderate Risk  |
| Gilbert, 2003                          | ★<br>• State-wide database in California used<br>• 1.4 million deliveries over a 2-year period | ★<br>• All from same database       | ★<br>• ICD-9 codes used   | -<br>• Congenital malformations not excluded from                        | ★<br>• FGR vs non FGR                                           | ★<br>• Record linkage | -<br>• Unknown                                                                                       | ★<br>• 1.9% of data from database excluded due to inconsistency | ★★★★★★<br><br>Moderate Risk |

|                   |                                                                                                                                                                                                                                                                                                                                                      |                                                                                      |                                                                    |                                                                                                                                   |                                                                                              |                                                                      |                                                               |                                                                    |                  |
|-------------------|------------------------------------------------------------------------------------------------------------------------------------------------------------------------------------------------------------------------------------------------------------------------------------------------------------------------------------------------------|--------------------------------------------------------------------------------------|--------------------------------------------------------------------|-----------------------------------------------------------------------------------------------------------------------------------|----------------------------------------------------------------------------------------------|----------------------------------------------------------------------|---------------------------------------------------------------|--------------------------------------------------------------------|------------------|
|                   | included <ul style="list-style-type: none"> <li>• &lt; 2% of deliveries in California not captured in database</li> <li>• 97.9% of reported singleton deliveries linked with records</li> </ul>                                                                                                                                                      |                                                                                      |                                                                    | database <ul style="list-style-type: none"> <li>• Given this, unlikely CUAs known antenatally would have been excluded</li> </ul> |                                                                                              |                                                                      |                                                               | ncy with reported gestational age and birth weights                |                  |
| Baschat, 2007     | - <ul style="list-style-type: none"> <li>• Selected group → multicentre- 12 academic perinatal centres with tertiary NICU.</li> <li>• Inclusion- normal fetal anatomy, AC &lt;5<sup>th</sup> centile, Abnormal UA doppler flow, normal fetal karyotype, intact membranes without evidence of chorioamnionitis and/or perinatal infection.</li> </ul> | - <ul style="list-style-type: none"> <li>• No non-exposed cohort included</li> </ul> | ★ <ul style="list-style-type: none"> <li>• Records</li> </ul>      | ★ <ul style="list-style-type: none"> <li>• Normal fetal anatomy was an inclusion criterion</li> </ul>                             | - <ul style="list-style-type: none"> <li>• Outcome of interest not controlled for</li> </ul> | ★ <ul style="list-style-type: none"> <li>• Record linkage</li> </ul> | - <ul style="list-style-type: none"> <li>• Unknown</li> </ul> | - <ul style="list-style-type: none"> <li>• No statement</li> </ul> | ★★★<br>High Risk |
| Valcamonico, 2007 | - <ul style="list-style-type: none"> <li>• Selected group → &lt; 1000g and ≤ 34 weeks, without any morphological and/or chromosomal anomalies over a</li> </ul>                                                                                                                                                                                      | - <ul style="list-style-type: none"> <li>• No non-exposed cohort</li> </ul>          | ★ <ul style="list-style-type: none"> <li>• Record based</li> </ul> | ★ <ul style="list-style-type: none"> <li>• Congenital malformations excluded from cohort</li> </ul>                               | - <ul style="list-style-type: none"> <li>• Outcome of interest not controlled for</li> </ul> | ★ <ul style="list-style-type: none"> <li>• Record linkage</li> </ul> | - <ul style="list-style-type: none"> <li>• Unknown</li> </ul> | - <ul style="list-style-type: none"> <li>• No statement</li> </ul> | ★★★<br>High Risk |

|                  |                                                                                                    |                                       |                              |                                                                                     |                                                                               |                       |                                                                                                    |                                                         |                                    |
|------------------|----------------------------------------------------------------------------------------------------|---------------------------------------|------------------------------|-------------------------------------------------------------------------------------|-------------------------------------------------------------------------------|-----------------------|----------------------------------------------------------------------------------------------------|---------------------------------------------------------|------------------------------------|
|                  | 5 year period and born in Brescia                                                                  |                                       |                              |                                                                                     |                                                                               |                       |                                                                                                    |                                                         |                                    |
| Marsoosi, 2012   | -<br>• Selected group-FGR infants admitted to the perinatology warn in Tehran                      | -<br>• No non-exposed cohort included | ★<br>• Record based          | ★<br>• Exclusion criteria- Intrauterine IVH and structural or chromosomal anomalies | ★<br>• All infants given steroids                                             | ★<br>• Record linkage | ★<br>• Ultrasounds performed until day 7                                                           | ★<br>• 5% of infants did not have ultrasounds performed | ★★★★★★<br><br>Moderate<br><br>Risk |
| Ballardini, 2014 | ★<br>• All infants born at University Hospital in Italy between 33-36 <sup>+6</sup> weeks included | ★<br>• Same cohort analysed           | ★<br>• NEOCARE database used | ★<br>• Data on known malformations collected                                        | ★<br>• Controlled for weight <10 <sup>th</sup> and < 3 <sup>rd</sup> centiles | ★<br>• Record linkage | -<br>• Screened between 3-7 <sup>th</sup> day and repeated depending on result and gestational age | ★<br>• No infants lost to follow up                     | ★★★★★★<br><br>★<br><br>Low Risk    |
| Tul, 2015        | ★<br>• National registry used with birth data collected over a 10-year period                      | ★<br>• Same cohort analysed           | ★<br>• Record based          | -<br>• Unknown                                                                      | ★<br>• Controlled for weight                                                  | ★<br>• Record linkage | -<br>• Unknown                                                                                     | ★<br>• All infants in dataset were included             | ★★★★★★<br><br>Moderate<br><br>Risk |
| Starcevic, 2016  | -<br>• Selected group → 60 infants with late onset FGR                                             | -<br>• No non-exposed cohort included | ★<br>• Record based          | ★<br>• Congenital anomalies excluded                                                | -<br>• Outcome of interest not controlled for                                 | ★<br>• Record linkage | ★<br>• Ultrasounds performed on day 1,3 and 7                                                      | ★<br>• All subjects accounted for                       | ★★★★★<br><br>Moderate<br><br>Risk  |

|                     |                                                                                                                                                                                                                                                    |                                       |                              |                                                          |                                               |                                       |                |                                                                      |                       |
|---------------------|----------------------------------------------------------------------------------------------------------------------------------------------------------------------------------------------------------------------------------------------------|---------------------------------------|------------------------------|----------------------------------------------------------|-----------------------------------------------|---------------------------------------|----------------|----------------------------------------------------------------------|-----------------------|
| Krishnamurthy, 2017 | -<br>• Selected group → Infants < 10 <sup>th</sup> centile over a 4 year period in a tertiary hospital in Melbourne                                                                                                                                | -<br>• No non-exposed cohort included | ★<br>• Record based          | -<br>Congenital malformations not separated from results | -<br>• Outcome of interest not controlled for | ★<br>• Record linkage                 | -<br>• Unknown | ★<br>• 1% of study population excluded due to incomplete information | ★★★<br>High Risk      |
| Stimac, 2019        | -<br>• Selected group → Croatian hospital database used – tertiary centre which cares for population of 500,000<br>• 7 year period of deliveries included<br>• Infants < 5 <sup>th</sup> centile based on Croatian standard birth weights included | -<br>• No non-exposed cohort included | ★<br>• Records from database | -<br>• Unknown                                           | -<br>• Outcome of interest not controlled for | ★<br>• ICD-10 codes from records used | -<br>• Unknown | -<br>• No statement                                                  | ★★<br>High Risk       |
| Medina-Alva, 2019   | -                                                                                                                                                                                                                                                  | -<br>• No non-exposed cohort          | ★<br>• Record based          | ★                                                        | -<br>• Outcome of interest not controlled for | ★                                     | ★              | -                                                                    | ★★★★<br>Moderate Risk |
| Turcan, 2020        | ★<br>• Hospital based database (in Bucharest) over 3                                                                                                                                                                                               | ★<br>• Same cohort analyse            | ★<br>• Record based          | -<br>• Congenital malformations not                      | ★<br>• Controlled for weight                  | ★<br>• Record linkage                 | ★<br>• Unknown | -<br>• No statement                                                  | ★★★★★★<br>Moderate    |



## Newcastle Ottawa Scale

### CASE CONTROL STUDIES

Note : A study can be awarded a maximum of one star for each numbered item within the Selection and Exposure categories. A maximum of two stars can be given for Comparability

#### Selection

1. Is the case definition adequate?
  - a. yes, with independent validation ★
  - b. yes, eg record linkage or based on self-reports
  - c. no description
2. Representativeness of the cases
  - a. consecutive or obviously representative series of cases ★
  - b. potential for selection biases or not stated
3. Selection of Controls
  - a. community controls ★
  - b. hospital controls
  - c. no description
4. Definition of Controls
  - a. no history of disease (CUAs) ★
  - b. no description of source

#### Comparability

1. Comparability of cases and controls on the basis of the design or analysis
  - a. study controls for weight ★
  - b. study controls for any additional factor ★ (Steroid use)

#### Exposure

1. Ascertainment of exposure
  - a. secure record ★
  - b. structured interview where blind to case/control status ★
  - c. interview not blinded to case/control status
  - d. written self-report or medical record only
  - e. no description
2. Same method of ascertainment for cases and controls
  - a. yes ★
  - b. no
3. Non-Response rate
  - a. same rate for both groups ★
  - b. non respondents described
  - c. rate different and no designation



## Newcastle Ottawa Scale: CASE CONTROL STUDIES

|             | <u>Selection</u>                                                                                                                                 |                                                                                                    |                                                                                    |                                                                                                                                              | <u>Comparability</u>                                                                 | <u>Exposure</u>                                                                 |                                                                                               |                                                                         | <u>Total</u>                               |
|-------------|--------------------------------------------------------------------------------------------------------------------------------------------------|----------------------------------------------------------------------------------------------------|------------------------------------------------------------------------------------|----------------------------------------------------------------------------------------------------------------------------------------------|--------------------------------------------------------------------------------------|---------------------------------------------------------------------------------|-----------------------------------------------------------------------------------------------|-------------------------------------------------------------------------|--------------------------------------------|
|             | Is the Case Definition Adequate                                                                                                                  | Representativeness of the Cases                                                                    | Selection of Controls                                                              | Definition of Controls                                                                                                                       | Comparability of Cases and Controls on the Basis of the Design or Analysis           | Ascertainment of Exposure                                                       | Same method of ascertainment for cases and controls                                           | Non-Response Rate                                                       |                                            |
| Rocha, 2010 | <p>★</p> <ul style="list-style-type: none"> <li>Infants &lt; 10<sup>th</sup> centile based on American growth charts born 34-36 weeks</li> </ul> | <p>-</p> <ul style="list-style-type: none"> <li>Potential for selection bias not stated</li> </ul> | <p>-</p> <ul style="list-style-type: none"> <li>Hospital based controls</li> </ul> | <p>★</p> <ul style="list-style-type: none"> <li>Infants born at the same gestation with weight between 10-89<sup>th</sup> centile</li> </ul> | <p>★</p> <ul style="list-style-type: none"> <li>Study controls for weight</li> </ul> | <p>★</p> <ul style="list-style-type: none"> <li>Medical records used</li> </ul> | <p>★</p> <ul style="list-style-type: none"> <li>Retrospectively recruited for both</li> </ul> | <p>-</p> <ul style="list-style-type: none"> <li>No statement</li> </ul> | <p>★★★★★</p> <p>★</p> <p>Moderate Risk</p> |

*One star was awarded for each domain, except for comparability, where a maximum of two stars could be awarded. Total scores ranged from 0-9. Low risk of bias studies were awarded 7-9 stars, moderate risk of bias studies were awarded 4-6 stars and high risk of bias studies were awarded 0-3 stars.*
